# Supplementary material for: Palladium nanoparticles on the inner wall of tin oxide hollow nanospheres with enhanced hydrogen sensing properties
Source: Royal Society of Chemistry journal article supplement (doi:10.1039/c3ra41941j), 2013-01-01
Supplement: c3ra41941j.pdf [file c3ra41941j.pdf]

# Palladium nanoparticles on the inner wall of Tin oxide hollow nanosphere with enhanced hydrogen sensing property

Zhi-Min Cui<sup>a</sup>, Ahmed Mechai<sup>a</sup>, Lin Guo<sup>a\*</sup> and Wei-Guo Song<sup>b\*</sup>

<sup>a</sup> Key Laboratory of Bio-Inspired Smart Interfacial Science and Technology of Ministry of Education, School of Chemistry and Environment, Beihang University, Beijing 100191, PR China; E-mail: guolin@buaa.edu.cn

<sup>b</sup> Beijing National Laboratory for Molecular Sciences (BNLMS), Institute of Chemistry, Chinese Academy of Sciences, Beijing, 100190, P. R. China; E-mail: wsong@iccas.ac.cn

## Experimental Details

*Synthesis of SiO<sub>2</sub> nanosphere:* SiO<sub>2</sub> nanosphere was first produced by a modified stöber method<sup>1</sup>. Briefly, 6.0 mL NH<sub>3</sub>•H<sub>2</sub>O (28.0 wt% aqueous solution) was added to 180 mL ethanol to form solution A. 2.0 mL tetraethyl orthosilicate (TEOS) was added to 10.0 mL ethanol to form solution B. Then 2.0 mL solution B was added to Solution A and after stirring for 10 min the residual solution B was added to A. The mixed solution was stirred for another 3 h and then the white SiO<sub>2</sub> nanosphere with the diameter of about 300 nm was collected by centrifugation and washing.

*Preparation of Pd/SiO<sub>2</sub> nanostructure:* Pd nanoparticles were loaded on the SiO<sub>2</sub> nanosphere with the assistance of SnCl<sub>2</sub> according to the reference<sup>2</sup>. In a typical process, 100 mg SiO<sub>2</sub> nanosphere was dispersed in 50 mL distilled water and stirred for 10 min as part A. 0.1 g SnCl<sub>2</sub> was dissolved in 20 mL 0.02 M HCl solution as part B. Parts A and B were mixed together under stirring for 10 min. Then the suspension was centrifuged. After washing with distilled water five times, the precipitate was dispersed in 50 mL distilled water. Then a certain amount of PdCl<sub>2</sub> solution (0.0564 M) was added into it. Ten min later, 10 mL of 0.15 M sodium formate solution was added following stirring for 5 h. After centrifugation and washing with distilled water five times, the precipitate was dried at 60 °C for 12 h.

*Preparation of Pd/SnO<sub>2</sub> nanostructure:* The Pd/SiO<sub>2</sub> composite was encapsulated by SnO<sub>2</sub> according to Lou's work<sup>3, 4</sup>. Typically, 1.8g (30 mmol) urea and 0.266g (1 mmol) K<sub>2</sub>SnO<sub>3</sub>•3H<sub>2</sub>O was dissolved in 34 mL (de-ionized) DI water first, then 18 mL ethanol was added in the solution to form thin milky suspension under mind stir. 240 mg Pd/SiO<sub>2</sub> spheres was dispersed in another 4 mL DI water by ultra sonication. The two suspensions were mixed and transferred to a 100 mL teflon autoclave, which was

then heated in an electric oven at 170 °C for 36 h. After the autoclave cool down, the products were centrifuged and washed with DI water. The SiO<sub>2</sub> core can be etched in 2M NaOH in a 45 °C oven in 3–6 hours, and the hollow spheres were centrifuged and dried in an oven at 110 °C. In the control experiment, SnO<sub>2</sub> hollow sphere was obtained in the same procedure except that SiO<sub>2</sub> was instead of Pd/SiO<sub>2</sub>.

*Sensor fabrication and measurement:* The gas sensing properties was measured in a home made sensor testing system according to the reported procedure of our group<sup>5</sup>. Before the sample deposition, all samples including the Pd@SiO<sub>2</sub> composite and SnO<sub>2</sub> hollow sphere were annealed at 400 °C for 2 h. Then a certain amount of sample (commonly 5 μL suspension with a concentration of 100 mg/ml in water) was deposited on a commercial sensor electrode by spin coating. A constant flux of synthetic air of 200 mL/min was used as gas carrier. Hydrogen was used as the testing gas and was introduced into the testing chamber by mass flow controller with a concentration of 10 ppm, 20 ppm, 30 ppm, 40 ppm and 50 ppm, respectively. All the measurements were executed in a temperature-stabilized sealed chamber at 300 °C under controlled humidity. The electronic conductivity is measured by sourcemeter (KEITHLEY, Model 2400). The conductivity of the sensor film was measured by two probe method. In the sensor device, a 21 v voltage was applied and the current flow was measure. The resistance of the Pd/SnO<sub>2</sub> sensor films was obtained according to the formula below:

$$R=U/I$$

## Supporting Figures

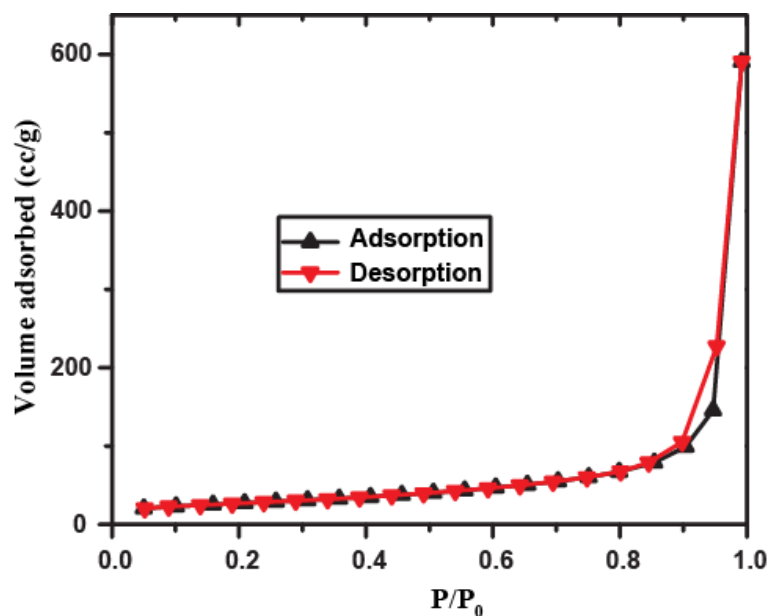

Figure S1 N<sub>2</sub> adsorption-desorption isotherm of the Pd@SnO<sub>2</sub> composite. The calculated BET surface area is 96.4 m<sup>2</sup>/g.

### References:

1. W. Stober, A. Fink and E. Bohn, *Journal of Colloid and Interface Science*, 1968, **26**, 62-&.
2. L. S. Zhong, J. S. Hu, Z. M. Cui, L. J. Wan and W. G. Song, *Chemistry of Materials*, 2007, **19**, 4557-4562.
3. X. W. Lou, C. Yuan and L. A. Archer, *Small*, 2007, **3**, 261-265.
4. W.-M. Zhang, J.-S. Hu, Y.-G. Guo, S.-F. Zheng, L.-S. Zhong, W.-G. Song and L.-J. Wan, *Advanced Materials*, 2008, **20**, 1160-+.
5. L.-S. Zhang, W. D. Wang, X.-Q. Liang, W.-S. Chu, W.-G. Song, W. Wang and Z.-Y. Wu, *Nanoscale*, 2011, **3**, 2458-2460.
